# Supplementary material for: Identification of key genes in coronary artery disease: an integrative approach based on weighted gene co-expression network analysis and their correlation with immune infiltration
Source: publisher site journal article supplement (doi:10.18632/aging.202638), 2021-03-03
Supplement: Supplementary file [file aging-v13i6-202638-supplementary-material-SD2.pdf]

## Supplementary Figure

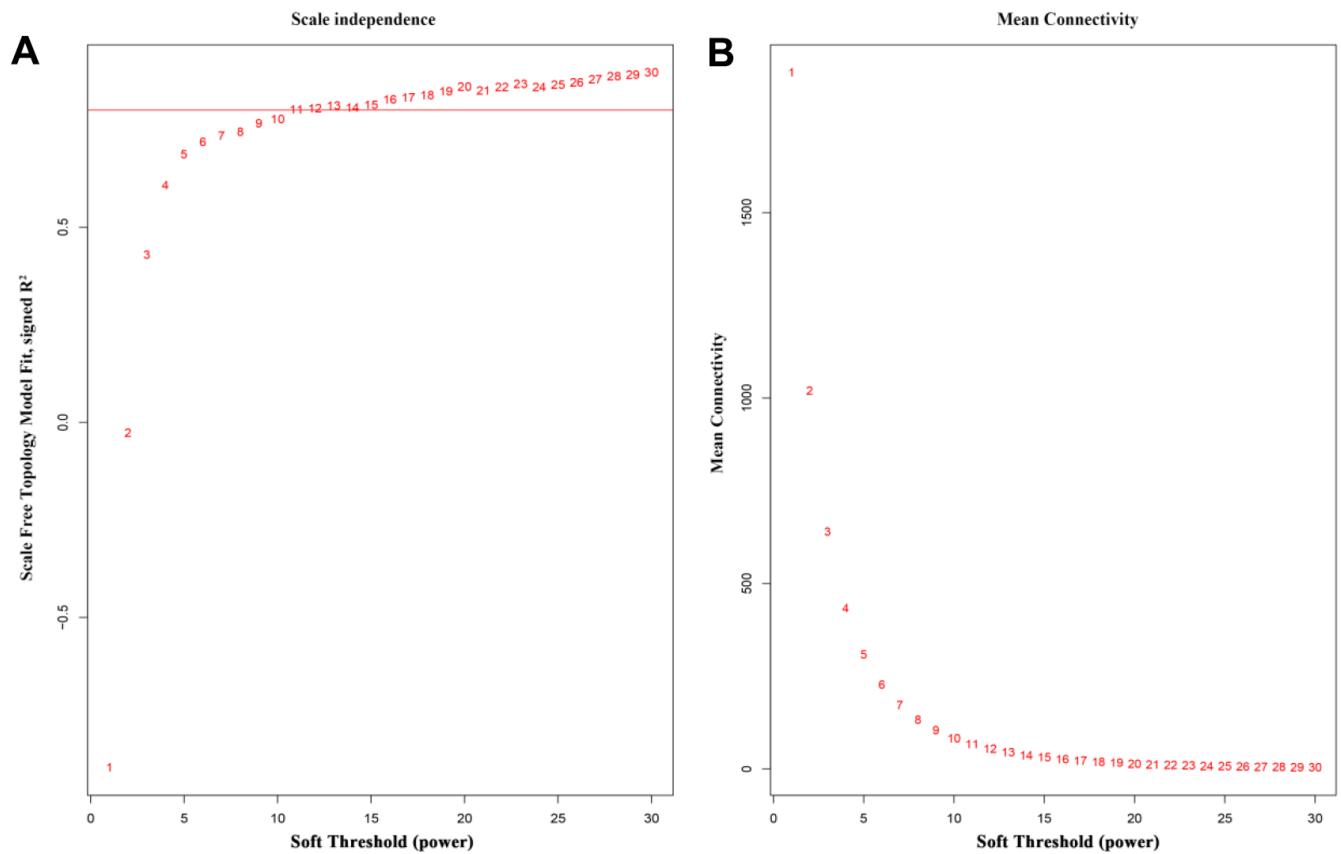

**Supplementary Figure 1. The soft threshold of WGCNA.** (A) Analysis of the scale-free fit index for various soft thresholding powers. (B) Analysis of the mean connectivity for various soft-thresholding powers.
